# Supplementary material for: A neutron irradiation-induced displacement damage of indium vacancies in α-In2Se3 nanoflakes
Source: Royal Society of Chemistry journal article supplement (doi:10.1039/d0cp02375b), 2020-01-01
Supplement: d0cp02375b1.pdf [file d0cp02375b1.pdf]

# Neutron irradiation induced displacement damage of indium vacancies on $\alpha$ -In<sub>2</sub>Se<sub>3</sub> nanoflakes

Pengfei Hou<sup>a,b,c,d,\*\*</sup>, Xinhao Wang<sup>a,b,c,d</sup>, Yunxia Liu<sup>a,b,c,d</sup>, Yun Chen<sup>a,b,c,d</sup>, Shijian Dong<sup>a</sup>, Hongxia Guo<sup>a,c,d</sup>, Jinbin Wang<sup>a,\*</sup>, Xiangli Zhong<sup>a</sup> and Xiaoping Ouyang<sup>a,b,c,d</sup>

<sup>a</sup> Key Laboratory of Low-dimensional Materials and Application Technology, School of Materials Science and Engineering, Xiangtan University, Xiangtan 411105, China

<sup>b</sup> Foshan Green Intelligent Manufacturing Research Institute of Xiangtan University, Foshan 528000, China

<sup>c</sup> Science and Technology on Reliability Physics and Application Technology of Electronic Component Laboratory, Guangzhou 510610, China

<sup>d</sup> State Key Laboratory of Intense Pulsed Radiation Simulation and Effect, Xi'an, 710024, China

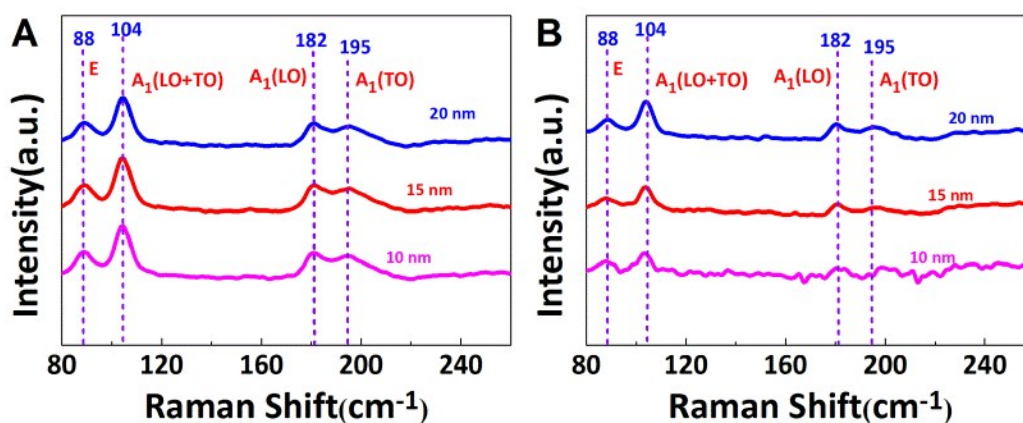

**FIG S1.** Raman spectra image of different thick  $\alpha$ -In<sub>2</sub>Se<sub>3</sub> nanoflakes and substrate with the 532 nm laser excitation. (a) Before neutron irradiation. (b) After neutron irradiation.

\* Corresponding Author. houpf@xtu.edu.cn and jbwang@xtu.edu.cn

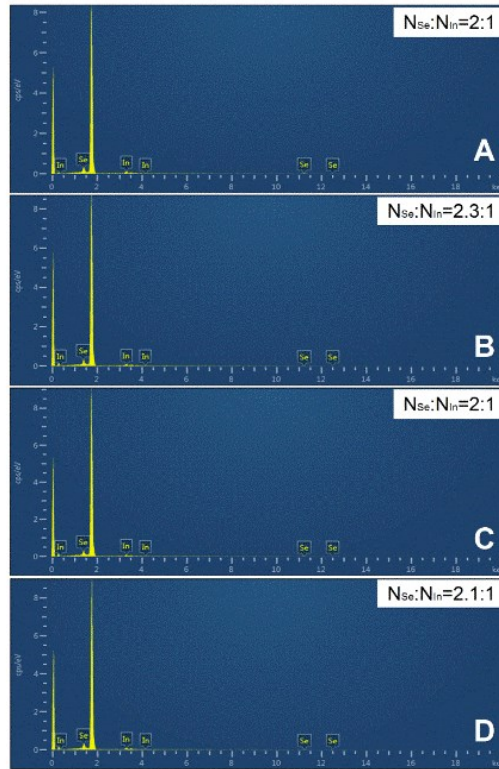

**FIG. S2.** The EDS results of different regions of the  $\alpha$ - $\text{In}_2\text{Se}_3$  nanoflakes after neutron irradiation: (a) 10 nm, (b) 15 nm, (c) 20 nm, (d) 30 nm.

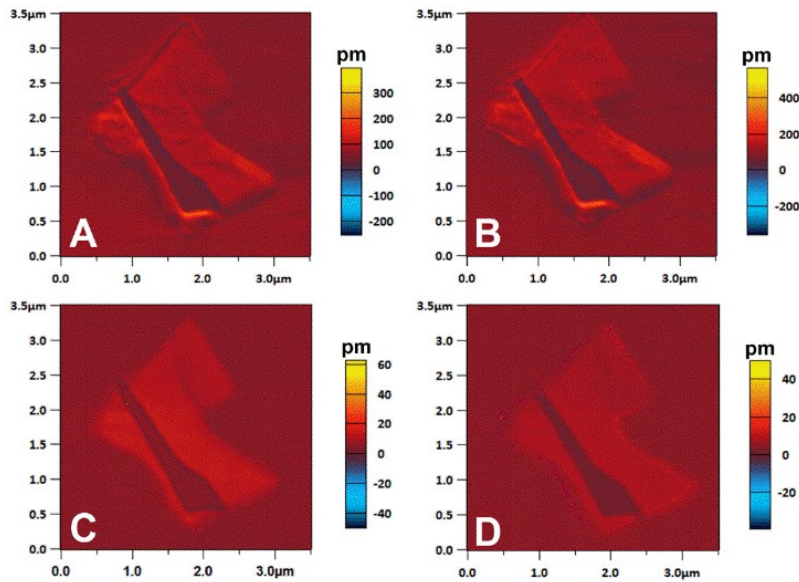

**FIG. S3.** PFM amplitude images of the  $\alpha$ - $\text{In}_2\text{Se}_3$  nanoflakes before (a,c) and after (b,d) neutron irradiation. (a,b) IP phase images. (c,d) OOP phase images.

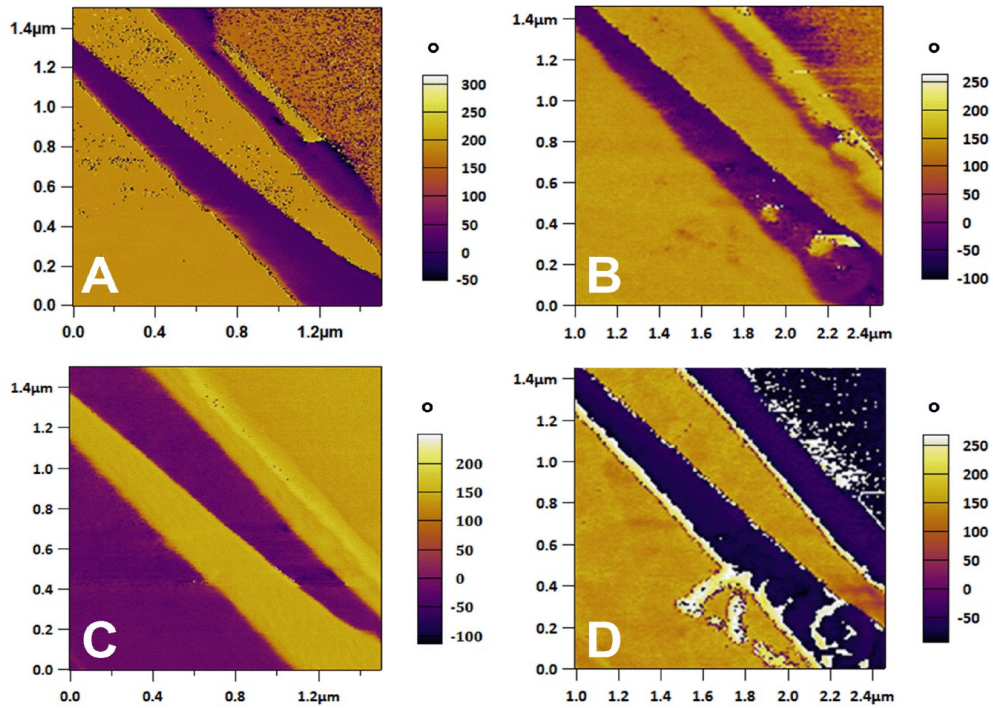

**FIG S4.** PFM phase images of the  $\alpha$ - $\text{In}_2\text{Se}_3$  nanoflakes (10~15 nm) before (a,c) and after (b,d) neutron irradiation. (a,b) In-plane phase images. (c,d) Out-of-plane phase images.

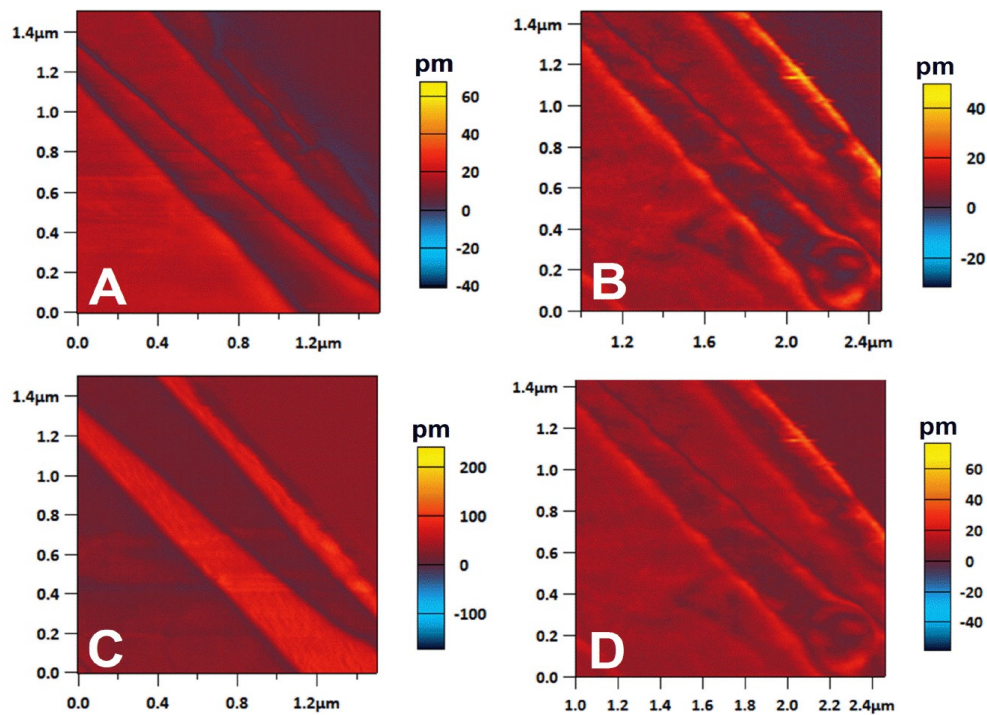

**FIG S5.** PFM amplitude images of the  $\alpha$ - $\text{In}_2\text{Se}_3$  nanoflakes (10~20 nm) before (a,c) and after (b,d) neutron irradiation. (a,b) In-plane phase images. (c,d) Out-of-plane phase images.
